# Supplementary material for: Auf dem Weg zur Hebamme in Deutschland
Source: Springer Nature journal article supplement (doi:10.1007/s43877-021-0120-8), 2021-08-01
Supplement: MOESM1 [file 19552582]

## Literatur

### zum Beitrag „Auf dem Weg zur Hebamme in Deutschland“ von Jana Lowsky und Melita Grieshop

HebammenWissen (2) 3/2021, S. 28-30

Ausbildungs- und Prüfungsverordnung für Hebammen und Entbindungspfleger in der Fassung der Bekanntmachung vom 16. März 1987 (BGBl. I S. 929), zuletzt geändert durch Artikel 11 des Gesetzes vom 18. April 2016 (BGBl. I S. 886)

Blättner, B., & Rocholl, A. (2020). Integration internationaler Hebammen in geburtshilfliche Teams. Zeitschrift für Hebammenwissenschaft, S. 68-73.

Böse, C., & Schmitz, N. (2020). BIBB Anerkennungsmonitoring. Bundesinstitut für Berufsbildung.

Bundesministerium für Inneres (BMI) (2021).  
<https://www.bmi.bund.de/DE/themen/heimat-integration/integration/integration-bedeutung/integration-bedeutung-node.html>

Deutsche Gesellschaft für Gynäkologie und Geburtshilfe (DGGG) & Deutsche Gesellschaft für Hebammenwissenschaft (DGHWI) (2021): Vaginale Geburt am Termin. S3 Leitlinie. AWMF Registernummer 015 – 083; [https://www.awmf.org/uploads/tx\\_szleitlinien/015-083I\\_S3\\_Vaginale-Geburt-am-Termin\\_2021-03.pdf](https://www.awmf.org/uploads/tx_szleitlinien/015-083I_S3_Vaginale-Geburt-am-Termin_2021-03.pdf)

Deutsche Gesellschaft für Hebammenwissenschaft e. V. (DGHWi) (2017). Deutschland weiterhin Schlusslicht bei der hochschulischen Hebammenausbildung in Europa. Stellungnahme der Sektion Hochschulbildung der DGHWi vom 06. Januar 2017.

Deutscher Hebammenverband e. V. (DHV) & Picker Institut Deutschland gGmbH (2016). Die Arbeitssituation von angestellten Hebammen in Kliniken. Hebammenbefragung 2015.

Esser, H. (2006). Migration, Sprache und Integration. (AKI-Forschungsbilanz, 4). Berlin: Wissenschaftszentrum Berlin für Sozialforschung gGmbH FSP Zivilgesellschaft, Konflikte und Demokratie Arbeitsstelle Interkulturelle Konflikte und gesellschaftliche Integration - AKI-. <https://nbn-resolving.org/urn:nbn:de:0168-ssoar-113493>

Fendel, Tanja; Yildiz, Özlem (2020). Integrationspfade geflüchteter Frauen in Arbeitsmarkt und Gesellschaft. In: A.- H. Carl et al. (Hrsg.), Geschlechterverhältnisse im Kontext von Unternehmen und Gesellschaft, S. 55-72. 1. Auflage. Nomos. Berlin

Forschungsbereich beim Sachverständigenrat deutscher Stiftungen für Integration und Migration (SVR-Forschungsbereich) (2017). Wie gelingt Integration? Asylsuchende über ihre Lebenslagen und Teilhabe - Perspektiven in Deutschland. Eine Studie des SVR-Forschungsbereichs und der Robert Bosch Stiftung, Berlin.

Gesetz über das Studium und den Beruf von Hebammen (Hebammengesetz / HeG) vom 22. November 2019. BGBl 2019 Teil I Nr. 42, ausgegeben zu Bonn am 28. November 2019, zuletzt geändert durch Artikel 10 des Gesetzes vom 24. Februar 2021 (BGBl. I S. 274)

Gesetz über den Beruf der Hebamme und des Entbindungspfleger (Hebammengesetz / HebG) vom 4. Juni 1985 (BGBl. I S. 902), zuletzt geändert durch Artikel 17b des Gesetzes vom 23. Dezember 2016 (BGBl. I S. 3191)

Gesetz zur Reform der technischen Assistenzberufe in der Medizin und zur Änderung weiterer Gesetze (MTA-Reform-Gesetz) vom 24. Februar 2021. BGBl Jahrgang 2021 Teil I Nr. 9, ausgegeben zu Bonn am 3. März 2021

Grieshop, M. (2017). Innovatives Lernen – Forschendes Lernen in der akademischen Hebammenausbildung. 28. Kongress für Perinatale Medizin. 30. November - 2. Dezember 2017. Berlin.

Klafki, W. (2007). Neue Studien zur Bildungstheorie und Didaktik: Zeitgemäße Allgemeinbildung und kritisch-konstruktive Didaktik (6., unveränderte Aufl.). Weinheim. 7.Studie

Integration durch Qualifikation (IQ) (2021). <https://www.berlin.netzwerk-iq.de/index.php?id=70>

International Confederation of Midwives (2019): Essential competencies for midwifery practice. Update. <https://internationalmidwives.org/our-work/policy-and-practice/essential-competencies-for-midwifery-practice.html>

Javanmard, M. et al. (2019). Transition experiences of internationally qualified midwives practising midwifery in Australia: in: Women Birth (2019), <https://doi.org/10.1016/j.wombi.2019.05.002>

Mihali, L., Müller, E. M., & Ayan, T. (2012). Erwerbsverläufe von Migrantinnen im Sozial- und Gesundheitswesen: welche Implikationen ergeben sich für eine migrationsspezifische Beratung? BIOS - Zeitschrift für Biographieforschung, Oral History und Lebensverlaufsanalysen, 25(2), 228-242. <https://nbn-resolving.org/urn:nbn:de:0168-ssoar-392456>

Runder Tisch Geburtshilfe. (1.2.2018). Berliner Aktionsprogramm für eine sichere und gute Geburt. Berlin: Senatsverwaltung für Gesundheit und Soziales.

Siebert, H. (2009): Didaktisches Handeln in der Erwachsenenbildung. Didaktik aus konstruktivistischer Sicht. Schäffer Poeschel Verlag. 2. Überarbeitete Auflage

Söhn, J. et al. (2017). Erfolgsfaktoren für die Integration von Flüchtlingen. (Forschungsbericht / Bundesministerium für Arbeit und Soziales, FB484). Göttingen: Bundesministerium für Arbeit und Soziales; Soziologisches Forschungsinstitut an der Universität Göttingen e.V. (SOFI). <https://nbn-resolving.org/urn:nbn:de:0168-ssoar-52352-9>

Studien- und Prüfungsverordnung für Hebammen (HebStPrV) vom 8.1.2020. BGBl Jahrgang 2020 Teil I Nr. 2, ausgegeben zu Bonn am 10.1.2020
